## RESEARCH ARTICLE

# Correlates of hospitalizations in internal medicine divisions among Israeli adults of different ethnic groups with hypertension, diabetes and cardiovascular diseases

Shira Sagie<sup>1</sup>, Wasef Na'amnih<sup>1</sup>, Juda Frej<sup>1</sup>, Daniel Cohen<sup>1</sup>, Gershon Alpert<sup>2</sup>, Khitam Muhsen<sup>1\*</sup>

**1** Department of Epidemiology and Preventive Medicine, School of Public Health, Sackler Faculty of Medicine, Tel Aviv University, Ramat Aviv, Tel Aviv, Israel, **2** Clalit Health Services, Hadera, Israel

\* [kmuhsen@tauex.tau.ac.il](mailto:kmuhsen@tauex.tau.ac.il)

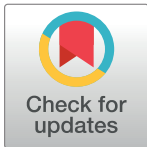

## OPEN ACCESS

**Citation:** Sagie S, Na'amnih W, Frej J, Cohen D, Alpert G, Muhsen K (2019) Correlates of hospitalizations in internal medicine divisions among Israeli adults of different ethnic groups with hypertension, diabetes and cardiovascular diseases. PLoS ONE 14(4): e0215639. <https://doi.org/10.1371/journal.pone.0215639>

**Editor:** Sandra C. Buttigieg, University of Malta Faculty of Health Sciences, MALTA

**Received:** June 18, 2018

**Accepted:** April 7, 2019

**Published:** April 24, 2019

**Copyright:** © 2019 Sagie et al. This is an open access article distributed under the terms of the [Creative Commons Attribution License](https://creativecommons.org/licenses/by/4.0/), which permits unrestricted use, distribution, and reproduction in any medium, provided the original author and source are credited.

**Data Availability Statement:** We used deidentified patients' data from a computerized database of a health maintenance organization. These data were collected as part of patients' clinical care, and not for research purposes. Legal and ethical restrictions apply for secondary usage of these data in research. Our Helsinki committee (Ethics) approval does not allow providing any individual level data, even if coded, to be publicly available. However, all data are presented within the manuscript in an aggregative manner that allows

## Abstract

### Background

Disparities in non-communicable diseases (NCDs) may affect health care utilization. We compared the correlates of hospitalizations in internal medicine divisions, of adults with NCDs, between the main population groups in Israel.

### Methods

A cross-sectional study was conducted among Jews (N = 17,952) and Arabs (N = 10,441) aged  $\geq 40$  years with diabetes, hypertension or cardiovascular diseases, utilizing the computerized database of the largest health maintenance organization in Israel. Information was retrieved on sociodemographics, background diseases, hospitalizations and utilizations of other health services. Multivariable log binomial regression models were performed.

### Results

Overall, 3516 (12.4%) patients were hospitalized at least once during a one-year period (2008). Hospitalization in internal medicine divisions was more common among Arab than Jewish patients; prevalence ratio 1.24 (95% CI 1.14–1.35), and increased with age ( $P < 0.001$ ). An inverse association was found between residential socioeconomic status and hospitalization among Jewish patients, but not among Arab, who lived mostly in low socioeconomic status communities. In both population groups, congestive heart failure, arrhythmias, heart surgery, cardiac catheterization, kidney disease, asthma, neurodegenerative diseases, mental illnesses, smoking (in men) and disability were positively related to hospitalization in internal medicine divisions, which was more common also in patients who consulted any specialist and a specialist in cardiology. Emergency room visits, consulting with an ophthalmologist and performing cancer screening tests were inversely related to hospitalizations among Jewish patients only ( $P = 0.009$  and  $P = 0.067$  for interaction, respectively).

other researchers to replicate our analyses and generate statistical measures such as odds ratio and p values.

**Funding:** This study was funded by the Israel National Institute for Health Policy and Health Services Research awarded to Dr. K. Muhsen (Award number 32/2007A). The funders had no role in study design, data collection and analysis, decision to publish, or preparation of the manuscript.

**Competing interests:** The authors have declared that no competing interests exist.

## Conclusions

In a country with universal health insurance, the correlates of hospitalizations included sociodemographics, multi-morbidity, health behaviors and health services use patterns. Socioeconomic disparities might account for ethnic differences in hospitalizations. Individuals with several NCDs, rather than one specific disease, disability and smoking should be targeted to reduce healthcare costs related to hospitalizations.

## Introduction

Non-communicable diseases (NCDs), including cardiovascular diseases (CVD), cancer, chronic respiratory diseases and diabetes, account for 70% of deaths worldwide; CVD is considered the cause of 31% of all deaths [1]. Behavioral risk factors such as physical inactivity, smoking and poor diet explain nearly 80% of the CVD burden, making these diseases and their risk factors a main target for interventions [2]. Disparities in health and in NCDs exist between and within countries, and they are affected by social determinants, including education, income and ethnicity [3–8].

In Israel, cancer, heart disease, stroke and diabetes are currently the leading causes of death; nearly 50% of all deaths in 2016 were attributed to these conditions [9]. We and others have demonstrated health disparities between the two main population groups in Israel, the Jewish and Arab populations, in NCD morbidity and its related risk factors and mortality [10–12]. Despite the continuous increase in both populations, life expectancy remains consistently lower among the Arab compared to the Jewish population, and the gap in life expectancy has been widening over recent years [10]. In 2017, life expectancy at birth was 3.7 years lower in Arab than Jewish men: 77.5 and 81.2 years, respectively, and 3.0 years lower in Arab vs. Jewish women; 82.0 vs. 85.0 years [13]. The higher mortality rates of heart diseases, stroke and diabetes among the Arab population [10] contribute substantially to the gap in life expectancy between the two population groups [14, 15].

Disparities between Arabs and Jews in Israel were also shown in health care utilization [12, 16, 17], despite the universal health insurance law and high access to care in both populations. Findings from national health surveys have shown higher age-adjusted rates of hospitalizations among Arabs than Jews. Such differences were observed in nearly all age-strata for both sexes [16, 17]. Interestingly, Arab participants reported visiting a family physician more often than Jewish participants, while the latter more often visited specialist physicians [16–18]. Clearly, utilization of health services is affected by health status; however, additional factors were also found to be important, including sex, age, income, social/health insurance status and language barriers [19–21]. We showed a significantly higher age-adjusted rate of hospitalization in internal medicine divisions among Arabs with NCDs than among Jews living in the same region [22]. The aim of the current study was to compare the correlates of hospitalizations in internal medicine divisions between Arab and Jewish patients with chronic diseases: CVD, diabetes and hypertension, in Israel. Our hypothesis was that demographic, clinical and behavioral characteristics (e.g. comorbidities, health care utilization patterns) are related to hospitalizations, and that these might differ according to ethnic group.

## Materials and methods

### Study design and population

A cross-sectional study was conducted of all adults aged 40 years or above from the Hadera sub-district, utilizing the database of the Sharon-Shomron sub-district of Clalit Health Services

[23]. Clalit is the largest health maintenance organization (HMO) in Israel, insuring about 4.2 million members; i.e. ~52% of the Israeli population. The Hadera sub-district comprises 51.8% and 45.7% Jews and Arabs, respectively, compared with 75.5% and 20.4%, respectively, in the general population in Israel. Study eligibility criteria included: having CVD, hypertension or diabetes, as documented in the Clalit database by primary care physicians' reports at any time before or during 2008 (S1 and S2 Tables) [24]. This yielded a total of 31,883 persons. We excluded from the study 3471 patients with a diagnosis of cancer and 19 patients without information on ethnicity.

### Definitions of the dependent variable

The dependent variable was defined as at least one hospitalization in an internal medicine division during the study period year (2008) (yes or no), based on the documentation in the Clalit database. Hospitalizations in internal medicine divisions included: internal medicine departments, intensive care units, cardiac intensive care units and neurology departments. Documentation of hospitalizations is based on payments of Clalit Health Services to the hospitals for these services, therefore the accuracy is high.

### Definitions of the independent variables (S1 Table)

**Sociodemographic variables.** The main independent variable was population (ethnic group, Jews or Arabs, which was defined based on place of residence: Arab or Jewish town/city. Additional variables were sex and age (as a continuous variable in years, and as a categorical variable grouped as 40–44, 45–49, 50–54, 55–59, 60–64, 65–69, 70–74 and  $\geq 75$  years). Socioeconomic status (SES) was defined using the socioeconomic rank of place of residence according to the classification of the Central Bureau of Statistics. The ranks are on a scale from 1 to 10, with higher ranks representing a higher SES. This aggregative socioeconomic index reflects a combination of financial characteristics of a specific geographical unit, e.g. housing conditions, motorization, education and employment [25].

**Health related variables.** Information was collected on background diseases, physical disability, smoking and obesity, based on diagnoses recorded in medical records. Ischemic heart disease (IHD) was defined in the Clalit database. CVD was defined as having any of the following diagnoses: IHD, congestive heart failure (CHF), arrhythmia, pulmonary hypertension, cardiomyopathy, carotid artery disease or stroke. A comorbidity summative score was calculated (S2 Table). We obtained information about the number of cardiac interventions (heart surgeries and cardiac catheterizations). We obtained data on health care utilization including performing cancer screening tests (stool occult blood, prostatic specific antigen [PSA] for men and mammography for women), influenza vaccination and visits to specialist physicians.

### Data analysis

The study sample was described using descriptive statistics. A bivariate analysis comparing hospitalizations in internal medicine divisions according to the independent variables (sociodemographics and background morbidity) was performed using chi square test and Fisher Exact test as appropriate, for categorical variables, the Student's *t*-test for continuous variables, and the Mann-Whitney test for variables that did not follow normal distributions. For each independent variable, prevalence ratios (PR) and 95% confidence intervals (CI) were obtained from generalized linear models with log binomial regression models. Pooled and population stratified analyses were performed. Heterogeneity of the PRs according to population group was assessed using the chi square test for heterogeneity. Multivariable analyses were performed using generalized linear models with log binomial regression models, from which adjusted PR

(and 95% CI) were obtained for each independent variable. Interactions between each independent variable and population group were assessed in multivariable models. The Akaike information criterion was used to compare models. Correlations between independent variables were assessed by Spearman's correlation coefficient for ordinal variables and Phi correlation coefficient for nominal variables. Independent variables with correlation coefficients of 0.6 or greater were examined in separate models. Collinearity between independent variables was assessed using the variance inflation factor (VIF).  $P < 0.05$  was considered statistically significant. Data were analyzed using SPSS version 25 (IBM, New York, United States)

## Ethics

The study was approved by the ethical review committee of Clalit Health Services. The data used in the current study were anonymized.

## Results

During the study period (2008), there were 28,393 patients (mean age 63.1 years standard deviation [SD] 12.3), 52.2% women) who met the study inclusion criteria. The study sample consisted of 63.2% Jewish patients and 36.8% Arab patients. The mean age of the Arab patients was lower than that of Jewish patients by 7 years: 58.3 (SD 11.3) and 65.9 (SD 12.1) years, respectively ( $P < 0.001$ ). Arab and Jewish patients were comparable regarding sex distribution (53.8% and 51.3% were women, respectively). Arab patients lived in towns of lower SES rank than Jewish participants (mean 3.0 [SD 0.9] vs. 6.0 [SD 0.5],  $P < 0.001$ ).

Overall, hypertension, IHD and diabetes were documented in 74.8%, 26.9% and 48.6% of the study sample. The respective percentages among Jewish patients were 78.4%, 27.5% and 42.5%; and among Arab patients 68.5%, 25.9% and 58.9% ( $P < 0.001$  for all comparisons between Arab and Jewish patients).

A total of 3516 (12.4%) patients had at least one hospitalization in an internal medicine division during the study period, 11.7% and 13.6% among Jewish and Arab patients, respectively ( $P < 0.001$ ). In the Jewish sample this percentage was the same (11.7%) among men and women, compared to 15.2% and 12.1% among Arab men and women, respectively ( $P < 0.001$  for the difference between Arab men and women) ( $P < 0.001$  for heterogeneity).

## Correlates of hospitalizations in an internal medicine division (pooled analysis)

In a pooled analysis, hospitalization in internal medicine divisions increased with age ( $P$  for trend  $< 0.001$ ) and was 13.0% in men vs. 11.8% in women (Table 1). The mean rank of residential SES was lower in the hospitalized than the non-hospitalized group: 4.6 (SD 1.6) vs. 4.8 (1.6) ( $P < 0.001$ ).

Hospitalizations in internal medicine divisions were significantly more common in patients who had any of the examined background diseases ( $P < 0.001$ ) than in those who did not (Table 1). The magnitude of the associations differed for the various conditions, with unadjusted PR ranging between 1.20 (95% CI 1.12–1.29) for patients who had diabetes compared to those who did not, to a PR of 4.03 (95% CI 3.47–4.69) for patients who had CHF compared to those who did not (Table 2). The hospitalized group had a significantly higher mean comorbidity score (4.8 [SD 1.9]) than the non-hospitalized group (3.4 [SD 1.5])  $P < 0.001$ . Hospitalizations in internal medicine divisions were significantly more common in smokers and patients with obesity than in those without such conditions. Hospitalization in internal medicine divisions was more common in patients who utilized other health care services (except for cancer screening tests) than those who did not. Among patients who consulted with a cardiologist

Table 1. Hospitalizations in internal medicine divisions according to demographics, background diseases and utilization of other health care services <sup>a</sup>.

| Demographic variables     |       | Overall |                    |        | Jews   |                    |        | Arabs  |                    |        |
|---------------------------|-------|---------|--------------------|--------|--------|--------------------|--------|--------|--------------------|--------|
|                           |       | Total   | Hospitalized n (%) | p      | Total  | Hospitalized n (%) | p      | Total  | Hospitalized n (%) | p      |
| Sex                       | Men   | 13,576  | 1761 (13.0)        |        | 8750   | 1025 (11.7)        |        | 4826   | 736 (15.3)         |        |
|                           | Women | 14,817  | 1755 (11.8)        | 0.01   | 9202   | 1075 (11.7)        | 0.9    | 5615   | 680 (12.1)         | <0.001 |
| Age, years                |       |         |                    | <0.001 |        |                    | <0.001 |        |                    | <0.001 |
|                           | 40–44 | 1665    | 134 (8.0)          |        | 517    | 40 (7.7)           |        | 1148   | 94 (8.2)           |        |
|                           | 45–49 | 2493    | 195 (7.8)          | 0.8    | 975    | 68 (7.0)           | 0.6    | 1518   | 127 (8.4)          | 0.9    |
|                           | 50–54 | 3501    | 322 (9.2)          | 0.2    | 1794   | 141 (7.9)          | 0.9    | 1707   | 181 (10.6)         | 0.051  |
|                           | 55–59 | 4323    | 384 (8.9)          | 0.4    | 2657   | 213 (8.0)          | 0.8    | 1666   | 171 (10.3)         | 0.09   |
|                           | 60–64 | 4201    | 468 (11.1)         | 0.001  | 2892   | 267 (9.2)          | 0.3    | 1309   | 201 (15.4)         | <0.001 |
|                           | 65–69 | 3391    | 420 (12.4)         | <0.001 | 2122   | 195 (9.2)          | 0.3    | 1269   | 225 (17.7)         | <0.001 |
|                           | 70–74 | 3163    | 474 (15.0)         | <0.001 | 2307   | 285 (12.4)         | 0.008  | 856    | 189 (22.1)         | <0.001 |
|                           | ≥75   | 5656    | 1119 (19.8)        | <0.001 | 4688   | 891 (19.0)         | <0.001 | 968    | 228 (23.6)         | <0.001 |
| <b>Morbidity</b>          |       |         |                    |        |        |                    |        |        |                    |        |
| Hypertension              | No    | 7160    | 690 (9.6)          |        | 3872   | 368 (9.5)          |        | 3288   | 322 (9.8)          |        |
|                           | Yes   | 21,233  | 2826 (13.3)        | <0.001 | 14,080 | 1732 (12.3)        | <0.001 | 7153   | 1094 (15.3)        | <0.001 |
| Diabetes                  | No    | 14,603  | 1647 (11.3)        |        | 10,316 | 1121 (10.9)        |        | 4287   | 526 (12.3)         |        |
|                           | Yes   | 13,970  | 1869 (13.6)        | <0.001 | 7636   | 979 (12.8)         | <0.001 | 6157   | 890 (14.5)         | 0.005  |
| IHD                       | No    | 20,742  | 1780 (8.6)         |        | 13,009 | 1107 (8.5)         |        | 7733   | 673 (8.7)          |        |
|                           | Yes   | 7651    | 1736 (22.7)        | <0.001 | 4943   | 993 (20.1)         | <0.001 | 2708   | 743 (27.4)         | <0.001 |
| CHF                       | No    | 26,986  | 2907 (10.8)        |        | 17,195 | 1790 (10.4)        |        | 9791   | 1117 (11.4)        |        |
|                           | Yes   | 1407    | 609 (43.3)         | <0.001 | 757    | 310 (41.0)         | <0.001 | 650    | 299 (46.0)         | <0.001 |
| Cardiomyopathy            | No    | 27,991  | 3393 (12.1)        |        | 17,716 | 2033 (11.5)        |        | 10,275 | 1360 (13.2)        |        |
|                           | Yes   | 402     | 123 (30.6)         | <0.001 | 236    | 67 (28.4)          | <0.001 | 166    | 56 (33.7)          | <0.001 |
| Arrhythmia                | No    | 25,428  | 2572 (10.1)        |        | 15,936 | 1488 (9.3)         |        | 9492   | 1084 (11.4)        |        |
|                           | Yes   | 2965    | 944 (31.8)         | <0.001 | 2016   | 612 (30.4)         | <0.001 | 949    | 332 (35.0)         | <0.001 |
| Carotid artery disease    | No    | 27,448  | 3301 (12.0)        |        | 17,147 | 1942 (11.3)        |        | 10,301 | 1359 (13.2)        |        |
|                           | Yes   | 945     | 215 (22.8)         | <0.001 | 805    | 158 (19.6)         | <0.001 | 140    | 59 (40.7)          | <0.001 |
| Stroke                    | No    | 25,644  | 2706 (10.6)        |        | 16,145 | 1618 (10.0)        |        | 9499   | 1088 (11.5)        |        |
|                           | Yes   | 2749    | 810 (29.5)         | <0.001 | 1807   | 482 (26.7)         | <0.001 | 942    | 328 (34.8)         | <0.001 |
| CVD                       | No    | 17,589  | 1032 (5.9)         |        | 10,870 | 635 (5.8)          |        | 6719   | 397 (5.9)          |        |
|                           | Yes   | 10,804  | 2484 (23.0)        | <0.001 | 7082   | 1465 (20.7)        | <0.001 | 3722   | 1019 (27.4)        | <0.001 |
| Cardiac catheterization   | No    | 26,048  | 2719 (10.4)        |        | 16,552 | 1693 (10.2)        |        | 9496   | 1026 (10.8)        |        |
|                           | Yes   | 2345    | 797 (34.0)         | <0.001 | 1400   | 407 (29.1)         | <0.001 | 945    | 390 (41.3)         | <0.001 |
| Past heart surgery        | No    | 28,243  | 3428 (12.1)        |        | 17,861 | 2051 (11.5)        |        | 10,382 | 1377 (13.3)        |        |
|                           | Yes   | 150     | 88 (58.7)          | <0.001 | 91     | 49 (53.8)          | <0.001 | 59     | 39 (66.1)          | <0.001 |
| Kidney disease            | No    | 26,893  | 2976 (11.1)        |        | 16,897 | 1777 (10.5)        |        | 9996   | 1199 (12.0)        |        |
|                           | Yes   | 1500    | 540 (36.0)         | <0.001 | 1055   | 323 (30.6)         | <0.001 | 445    | 217 (48.8)         | <0.001 |
| Mental illness            | No    | 24,477  | 2736 (11.2)        |        | 14,803 | 1505 (10.2)        |        | 9674   | 1231 (12.7)        |        |
|                           | Yes   | 3916    | 780 (19.9)         | <0.001 | 3149   | 595 (18.9)         | <0.001 | 767    | 185 (24.1)         | <0.001 |
| Neurodegenerative disease | No    | 27,358  | 3217 (11.8)        |        | 17,103 | 1862 (10.9)        |        | 10255  | 1355 (13.2)        |        |
|                           | Yes   | 1035    | 299 (28.9)         | <0.001 | 849    | 238 (28.0)         | <0.001 | 186    | 61 (32.8)          | <0.001 |
| Hyperlipidemia            | No    | 7047    | 633 (9.0)          |        | 4272   | 393 (9.2)          |        | 2775   | 240 (8.6)          |        |
|                           | Yes   | 21,346  | 2883 (13.5)        | <0.001 | 13,680 | 1707 (12.5)        | <0.001 | 7666   | 1176 (15.3)        | <0.001 |
| Asthma                    | No    | 26,073  | 3097 (11.9)        |        | 16,482 | 1859 (11.3)        |        | 9591   | 1238 (12.9)        |        |
|                           | Yes   | 2320    | 419 (18.1)         | <0.001 | 1470   | 241 (16.4)         | <0.001 | 850    | 178 (20.9)         | <0.001 |
| Disability                | No    | 26,503  | 2879 (10.9)        |        | 16,786 | 1726 (10.3)        |        | 9717   | 1153 (11.9)        |        |

(Continued)

Table 1. (Continued)

| Demographic variables                                       |     | Overall |                    |        | Jews   |                    |        | Arabs |                    |        |
|-------------------------------------------------------------|-----|---------|--------------------|--------|--------|--------------------|--------|-------|--------------------|--------|
|                                                             |     | Total   | Hospitalized n (%) | p      | Total  | Hospitalized n (%) | p      | Total | Hospitalized n (%) | p      |
|                                                             | Yes | 1890    | 637 (33.7)         | <0.001 | 1166   | 374 (32.1)         | <0.001 | 724   | 263 (36.3)         | <0.001 |
| <b>Health behavior and health care utilization patterns</b> |     |         |                    |        |        |                    |        |       |                    |        |
| Obesity                                                     | No  | 17,665  | 1996 (11.3)        |        | 12,392 | 1360 (11.0)        |        | 5273  | 636 (12.1)         |        |
|                                                             | Yes | 10,728  | 1520 (14.2)        | <0.001 | 5560   | 740 (13.3)         | <0.001 | 5168  | 780 (15.1)         | <0.001 |
| Smoking                                                     | No  | 19,484  | 2138 (11.0)        |        | 12,747 | 1397 (11.0)        |        | 6737  | 741 (11.0)         |        |
|                                                             | Yes | 8909    | 1378 (15.5)        | <0.001 | 5205   | 703 (13.5)         | <0.001 | 3704  | 675 (18.2)         | <0.001 |
| Received influenza vaccine                                  | No  | 15,387  | 1412 (9.2)         |        | 9930   | 934 (9.4)          |        | 5457  | 478 (8.8)          |        |
|                                                             | Yes | 13,006  | 2104 (16.2)        | <0.001 | 8022   | 1166 (14.5)        | <0.001 | 4984  | 938 (18.8)         | <0.001 |
| Performed HbA1c test                                        | No  | 2182    | 222 (10.2)         |        | 1273   | 132 (10.4)         |        | 909   | 90 (9.9)           |        |
|                                                             | Yes | 14,616  | 2066 (14.1)        | <0.001 | 8407   | 1129 (13.4)        | <0.001 | 6209  | 937 (15.1)         | <0.001 |
| Consulted a specialist                                      | No  | 6549    | 491 (7.5)          |        | 3800   | 272 (7.2)          |        | 2749  | 219 (8.0)          |        |
|                                                             | Yes | 21,844  | 3025 (13.8)        | <0.001 | 14,152 | 1828 (12.9)        | <0.001 | 7692  | 1197 (15.6)        | <0.001 |
| Consulted a diabetes specialist                             | No  | 26,098  | 3089 (11.8)        |        | 16,717 | 1908 (11.4)        |        | 9381  | 1181 (12.6)        |        |
|                                                             | Yes | 2295    | 427 (18.6)         | <0.001 | 1235   | 192 (15.5)         | <0.001 | 1060  | 235 (22.2)         | <0.001 |
| Consulted a cardiologist                                    | No  | 22,072  | 1870 (8.5)         |        | 13,636 | 1122 (8.2)         |        | 8436  | 748 (8.9)          |        |
|                                                             | Yes | 6321    | 1646 (26.0)        | <0.001 | 4316   | 978 (22.7)         | <0.001 | 2005  | 668 (33.3)         | <0.001 |
| Consulted an ophthalmologist                                | No  | 16,883  | 1955 (11.6)        |        | 10,482 | 1183 (11.3)        |        | 6401  | 772 (12.1)         |        |
|                                                             | Yes | 11,510  | 1561 (13.6)        | <0.001 | 7470   | 917 (12.3)         | 0.071  | 4040  | 644 (15.9)         | <0.001 |
| Consulted a surgeon                                         | No  | 20,995  | 2429 (11.6)        |        | 12,564 | 1354 (10.8)        |        | 8431  | 1075 (12.8)        |        |
|                                                             | Yes | 7398    | 1087 (14.7)        | <0.001 | 5388   | 746 (13.8)         | <0.001 | 2010  | 341 (17.0)         | <0.001 |
| Performed a cancer screening test                           | No  | 16,657  | 2146 (12.9)        |        | 9696   | 1236 (12.7)        |        | 6961  | 910 (13.1)         |        |
|                                                             | Yes | 11,736  | 1370 (11.7)        | 0.007  | 8256   | 864 (10.5)         | <0.001 | 3480  | 506 (14.5)         | 0.07   |
| Emergency department visit                                  | No  | 23,459  | 2365 (10.1)        |        | 15,154 | 1467 (9.7)         |        | 8305  | 898 (10.8)         |        |
|                                                             | Yes | 4934    | 1151 (23.3)        | <0.001 | 2798   | 633 (22.6)         | <0.001 | 2136  | 518 (24.3)         | <0.001 |

<sup>a</sup> The data presented are absolute numbers and percentages in parentheses. P values were obtained by the chi square test.

CHF: congestive heart failure; CVD: cardiovascular disease; IHD: ischemic heart disease.

<https://doi.org/10.1371/journal.pone.0215639.t001>

hospitalization in an internal medicine division was 26.0% among patients who consulted with a cardiologist vs. 8.5% among patients who did not consult (Table 1).

### Correlates of hospitalizations in internal medicine divisions by population group

In the Jewish sample, the percentage of patients who were hospitalized in internal medicine divisions was relatively low (7.0%-9.2%) at ages 40–69 years, but increased to 12.4% in patients aged 70–74 years and 19.0% in those aged ≥75 years. In the Arab sample, percentages of hospitalized patients were 8.2%-10.3% at ages 40–59 years and increased substantially to 15.4% and 23.6% in the older age groups (P<0.001 for heterogeneity) (Tables 1 and 2). Among Jewish patients, residential SES was inversely related to hospitalizations, but not among Arabs (Table 2).

In both the Arab and Jewish samples, hospitalizations in internal medicine divisions were more common among patients who had any of the examined background diseases, obesity, smoking or disability than among patients who did not (Table 1). However, the magnitude of the association was stronger among Arabs for CVD, kidney disease hyperlipidemia and

**Table 2. Unadjusted associations of sociodemographic variables, background diseases and health care utilization pattern with hospitalizations in internal medicine divisions <sup>a</sup>.**

|                                                             | Overall          | Jews             | Arabs            | P for heterogeneity |
|-------------------------------------------------------------|------------------|------------------|------------------|---------------------|
|                                                             | PR<br>(95% CI)   | PR<br>(95% CI)   | PR<br>(95% CI)   |                     |
| <b>Sociodemographic variables</b>                           |                  |                  |                  |                     |
| Sex, Women vs. men                                          | 0.91 (0.85–0.98) | 1.00 (0.91–1.09) | 0.79 (0.71–0.89) | 0.001               |
| <b>Age, years (reference age 40–44)</b>                     |                  |                  |                  |                     |
| 45–49                                                       | 0.97 (0.77–1.22) | 0.90 (0.60–1.35) | 1.02 (0.77–1.35) | 0.6                 |
| 50–54                                                       | 1.14 (0.93–1.41) | 1.02 (0.71–1.46) | 1.30 (0.99–1.68) | 0.3                 |
| 55–59                                                       | 1.10 (0.90–1.35) | 1.04 (0.73–1.48) | 1.25 (0.96–1.63) | 0.4                 |
| 60–64                                                       | 1.38 (1.13–1.69) | 1.19 (0.85–1.69) | 1.88 (1.45–2.43) | 0.04                |
| 65–69                                                       | 1.54 (1.26–1.89) | 1.19 (0.83–1.69) | 2.17 (1.68–2.79) | 0.007               |
| 70–74                                                       | 1.86 (1.52–2.28) | 1.60 (1.13–2.25) | 2.70 (2.07–3.51) | 0.02                |
| ≥75                                                         | 2.46 (2.04–2.97) | 2.46 (1.76–3.42) | 2.88 (2.23–3.71) | 0.5                 |
| Residential SES, mean (SD)                                  | 0.96 (0.94–0.98) | 0.85 (0.78–0.93) | 0.98 (0.92–1.04) | 0.009               |
| <b>Background morbidity</b>                                 |                  |                  |                  |                     |
| Hypertension                                                | 1.38 (1.27–1.51) | 1.29 (1.15–1.46) | 1.56 (1.37–1.78) | <0.001              |
| IHD                                                         | 1.20 (1.12–1.29) | 1.18 (1.04–1.29) | 1.18 (1.05–1.32) | 0.4                 |
| Diabetes                                                    | 2.64 (2.46–2.84) | 2.36 (2.15–2.59) | 3.15 (2.82–3.53) | <0.001              |
| CHF                                                         | 4.03 (3.47–4.69) | 3.93 (3.42–4.53) | 4.03 (3.47–4.69) | 0.8                 |
| Cardiomyopathy                                              | 2.55 (1.87–3.47) | 2.47 (1.88–3.26) | 2.55 (1.87–3.47) | 0.9                 |
| Arrhythmia                                                  | 3.06 (2.66–3.52) | 3.25 (2.93–3.61) | 3.06 (2.66–3.52) | 0.5                 |
| Carotid artery disease                                      | 3.09 (2.26–4.22) | 1.73 (1.45–2.07) | 3.09 (2.26–4.22) | 0.002               |
| Stroke                                                      | 2.79 (2.56–3.05) | 2.66 (2.38–2.98) | 3.04 (2.64–3.50) | 0.006               |
| CVD                                                         | 3.35 (3.12–3.61) | 3.05 (2.78–3.35) | 3.93 (3.49–4.41) | <0.001              |
| Cardiac catheterization                                     | 3.26 (2.98–3.56) | 2.84 (2.52–3.21) | 3.82 (3.34–4.37) | <0.001              |
| Past heart surgery                                          | 4.83 (3.71–6.30) | 4.69 (3.30–6.66) | 4.98 (3.31–7.50) | 0.3                 |
| Kidney disease                                              | 3.25 (2.93–3.62) | 2.91 (2.55–3.33) | 4.07 (3.42–4.83) | <0.001              |
| Mental illness                                              | 1.78 (1.63–1.94) | 1.86 (1.69–2.06) | 1.90 (1.60–2.25) | 0.1                 |
| Neurodegenerative disease                                   | 2.46 (2.15–2.81) | 2.58 (2.21–3.00) | 2.48 (1.85–3.33) | 0.7                 |
| Hyperlipidemia                                              | 1.51 (1.37–1.65) | 1.36 (1.21–1.52) | 1.77 (1.53–2.05) | <0.001              |
| Asthma                                                      | 1.52 (1.36–1.70) | 1.45 (1.26–1.68) | 1.62 (1.37–1.93) | 0.2                 |
| Disability                                                  | 3.10 (2.81–3.42) | 3.12 (2.75–3.54) | 3.06 (2.63–3.57) | 0.8                 |
| Comorbidity score, median (IQR)                             | 1.44 (1.41–1.47) | 1.41 (1.37–1.44) | 1.49 (1.44–1.53) | <0.001              |
| <b>Health behavior and health care utilization patterns</b> |                  |                  |                  |                     |
| Obesity                                                     | 1.25 (1.17–1.35) | 1.21 (1.10–1.33) | 1.25 (1.12–1.40) | 0.6                 |
| Smoking                                                     | 1.41 (1.31–1.52) | 1.23 (1.12–1.36) | 1.66 (1.48–1.85) | <0.001              |
| Received influenza vaccine                                  | 1.76 (1.64–1.89) | 1.55 (1.49–1.69) | 2.15 (1.91–2.41) | <0.001              |
| Performed HbA1c test                                        | 1.39 (1.20–1.61) | 1.30 (1.07–1.57) | 1.52 (1.21–1.91) | 0.3                 |
| Consulted a specialist                                      | 1.85 (1.67–2.04) | 1.81 (1.58–2.06) | 1.95 (1.68–2.27) | 0.4                 |
| Consulted a diabetes specialist                             | 1.57 (1.41–1.75) | 1.36 (1.16–1.60) | 1.76 (1.51–2.05) | 0.008               |
| Consulted a cardiologist                                    | 3.07 (2.86–3.30) | 2.75 (2.51–3.02) | 3.76 (3.35–4.22) | <0.001              |
| Consulted an ophthalmologist                                | 1.17 (1.09–1.26) | 1.09 (0.99–1.19) | 1.32 (1.18–1.48) | 0.001               |
| Consulted a surgeon                                         | 1.27 (1.18–1.37) | 1.29 (1.17–1.41) | 1.33 (1.17–1.52) | 0.3                 |
| Performed a cancer screening test                           | 0.91 (0.84–0.97) | 0.82 (0.75–0.90) | 1.11 (0.99–1.25) | <0.001              |
| Emergency department visit                                  | 2.31 (2.14–2.50) | 2.34 (2.11–2.59) | 2.24 (1.99–2.52) | 0.6                 |

P for heterogeneity by population group was calculated by the chi square test for heterogeneity.

<sup>a</sup> CHF: congestive heart failure; CI: confidence intervals; CVD: cardiovascular disease; IHD: ischemic heart disease; IQR: interquartile range; PR: prevalence ratio; SD: standard deviation.

<https://doi.org/10.1371/journal.pone.0215639.t002>

smoking ( $P < 0.05$  for heterogeneity) (Table 2). The hospitalized group in the Jewish sample had a significantly higher mean comorbidity score (4.6 [SD 1.9]) than the non-hospitalized group (3.4 [SD 1.5])  $P < 0.001$ . The respective values among Arab patients were 4.9 (SD 1.9) and 3.4 (SD 1.5),  $P < 0.001$ .

In both population groups, significant positive associations were found between influenza vaccination, consulting a specialist and visiting the emergency room department, with hospitalizations in internal medicine divisions (Table 1), but the associations with influenza vaccine and consulting a diabetes specialist, cardiologist and ophthalmologist were of stronger magnitude among Arabs ( $P < 0.05$  for heterogeneity). Significant heterogeneity was also found in relation to performing cancer-screening tests, which was inversely related to hospitalizations in internal medicine divisions among Jewish patients only (Table 2).

### Multivariable analysis of the correlates of hospitalizations in internal medicine divisions

The variables, residential SES and population group, were highly correlated (Spearman's coefficient 0.89); therefore, they were not included in the same model, and separate analyses were

**Table 3. Multivariable analysis of the correlates of hospitalizations in internal medicine divisions among patients aged  $\geq 40$  years with cardiovascular disease, diabetes or hypertension <sup>a</sup>.**

|                                                     | Adjusted PR (95% CI) | P      |
|-----------------------------------------------------|----------------------|--------|
| <b>Sociodemographic variables</b>                   |                      |        |
| Population group (Arab vs. Jewish patients)         | 1.24 (1.14–1.35)     | <0.001 |
| Sex (women vs. men)                                 | 1.06 (0.97–1.16)     | 0.19   |
| Age in years (a continuous variable)                | 1.02 (1.01–1.03)     | <0.001 |
| <b>Background morbidity</b>                         |                      |        |
| Diabetes                                            | 1.08 (0.99–1.17)     | 0.06   |
| IHD                                                 | 1.10 (1.01–1.21)     | 0.048  |
| CHF                                                 | 1.52 (1.35–1.72)     | <0.001 |
| Arrhythmia                                          | 1.60 (1.45–1.76)     | <0.001 |
| Stroke                                              | 1.61 (1.45–1.78)     | <0.001 |
| Cardiac catheterization                             | 1.75 (1.57–1.96)     | <0.001 |
| Past heart surgery                                  | 1.52 (1.14–2.04)     | 0.004  |
| Kidney disease                                      | 1.46 (1.29–1.65)     | <0.001 |
| Neurodegenerative disease                           | 1.44 (1.23–1.68)     | <0.001 |
| Asthma                                              | 1.28 (1.13–1.44)     | <0.001 |
| Mental illness                                      | 1.36 (1.24–1.50)     | <0.001 |
| Disability                                          | 1.62 (1.43–1.83)     | <0.001 |
| <b>Health behaviors and health care utilization</b> |                      |        |
| Obesity                                             | 1.16 (1.07–1.25)     | <0.001 |
| Smoking                                             | 1.30 (1.19–1.42)     | <0.001 |
| Influenza vaccination                               | 1.11 (1.02–1.20)     | 0.02   |
| Consulted a specialist                              | 1.30 (1.16–1.47)     | <0.001 |
| Consulted a diabetes specialist                     | 1.16 (1.02–1.32)     | 0.02   |
| Consulted a cardiologist                            | 1.91 (1.75–2.09)     | <0.001 |
| Consulted an ophthalmologist                        | 0.89 (0.82–0.97)     | 0.008  |
| Performed a cancer screening test                   | 0.85 (0.79–0.93)     | <0.001 |
| Emergency department visit                          | 1.67 (1.54–1.82)     | <0.001 |

<sup>a</sup> CI: confidence intervals; CHF: congestive heart failure; IHD: ischemic heart disease; PR: prevalence ratio Adjusted for the variables in the table.

<https://doi.org/10.1371/journal.pone.0215639.t003>



performed for each population group. Weak correlations were found between some other independent variables (S1 Fig).

In an initial pooled multivariable analysis that included both population groups, hospitalization in internal medicine divisions was more common among Arab than Jewish patients: adjusted PR 1.24 (95% CI 1.14–1.35). Age was positively associated with hospitalizations in internal medicine divisions: adjusted PR 1.02 (95% CI 1.01–1.03) for each 1-year increase, but no significant difference was found between men and women ( $P = 0.19$ ). Hospitalization in internal medicine divisions was significantly higher, by 1.52 to 1.75-fold, in patients who had CHF, arrhythmia, stroke, cardiac catheterization, past heart surgery or disability than in patients who did not have such conditions. Associations of having kidney disease, asthma, neurodegenerative diseases and mental illnesses with hospitalization in internal medicine divisions were also significant, although these were of smaller magnitude, with adjusted PR of 1.28–1.46. Hospitalization in internal medicine divisions was 1.91-fold more common ( $P < 0.001$ ) in patients who consulted with a cardiologist and 1.67-fold higher ( $P < 0.001$ ) in patients who had visited the emergency room department than in patients who did not. Consulting any specialist or a diabetes specialist, and also smoking and obesity, demonstrated positive significant associations (adjusted PR of 1.11 to 1.30) with hospitalization in internal medicine divisions; while inverse associations were found with consulting an ophthalmologist (adjusted PR 0.89 [95% CI 0.82–0.97]) and performing a cancer screening test (adjusted PR 0.85 [95% CI 0.79–0.93]) (Table 3).

In a model that included residential SES as independent variable instead of population group, no significant association was found between residential SES and hospitalizations in internal medicine divisions: adjusted PR 0.89 (95% CI 0.77–1.02),  $P = 0.08$ . Associations of the other independent variables with hospitalizations in internal medicine departments were similar to those obtained in the initial model (S3 Table). In both models, the VIF values ranged between 1.02 and 1.49, suggesting no collinearity between the independent variables.

Additional multivariable models that included the same independent variables as in Table 2, and also an interaction term between the variable "population group" and one independent variable, showed significant interactions with IHD, influenza vaccination, consulting with an ophthalmologist and performing a cancer screening test. No significant ( $P = 0.7$ ) association was observed between having a diagnosis code of IHD and hospitalization in an internal medicine division among Jewish patients; however, Arab patients with a diagnosis code of IHD had 1.23-fold (95% CI 1.05–1.43) increased likelihood of hospitalization than Arabs lacking such a diagnosis code or than Jewish patients ( $P = 0.009$  for interaction). Having received an influenza vaccination was not associated with hospitalization in internal medicine divisions in Jewish patients ( $P = 0.9$ ); however, Arab patients who were vaccinated were hospitalized more often than those who were not vaccinated or than Jewish patients (adjusted PR 1.28 95% CI 1.09–1.50) ( $P = 0.002$  for interaction). Having consulted with an ophthalmologist was inversely related to hospitalizations among Jewish patients (adjusted PR 0.83 [95% CI 0.75–0.91]), but not among Arab patients (adjusted PR 1.23 [95% CI 1.05–1.43]), ( $P = 0.009$  for interaction). Similarly, performing a cancer screening test was inversely related to hospitalizations in internal medicine divisions among Jewish patients (adjusted PR 0.81 [95% CI 0.73–0.89]), but not among Arab patients (adjusted PR 1.16 [95% CI 0.99–1.36]), ( $P = 0.067$  for interaction) (Table 4 and S4 Table). No significant interactions were found of population group or patient sex with other independent variables. Multivariable models conducted separately for each population group and for each sex showed similar findings (Table 5).

**Table 4. Pooled multivariable models of the correlates of hospitalizations in internal medicine divisions with interaction terms <sup>a</sup>.**

|                                                                                        | Adjusted PR (95% CI) | P      |
|----------------------------------------------------------------------------------------|----------------------|--------|
| <b>Analysis 1</b>                                                                      |                      |        |
| Population group, Arab vs. Jewish patients (without a diagnosis code of IHD)           | 1.13 (1.02–1.26)     | 0.025  |
| IHD in Jewish patients                                                                 | 1.02 (0.91–1.14)     | 0.7    |
| Interaction population group 1 = Arabs * IHD                                           | 1.23 (1.05–1.43)     | 0.009  |
| <b>Analysis 2</b>                                                                      |                      |        |
| Population group, Arab vs. Jewish patients with no influenza vaccination               | 1.08 (0.95–1.22)     | 0.2    |
| Influenza vaccination in Jewish patients                                               | 1.00 (0.90–1.11)     | 0.9    |
| Interaction population group 1 = Arabs * influenza vaccination                         | 1.28 (1.09–1.50)     | 0.002  |
| <b>Analysis 3</b>                                                                      |                      |        |
| Population group, Arab vs. Jewish patients who did not consult with an ophthalmologist | 1.13 (1.02–1.27)     | 0.02   |
| Consulted an ophthalmologist, Jewish patients                                          | 0.83 (0.75–0.91)     | <0.001 |
| Interaction population group 1 = Arabs * consulted an ophthalmologist                  | 1.23 (1.05–1.43)     | 0.009  |
| <b>Analysis 4</b>                                                                      |                      |        |
| Population group, Arab vs. Jewish patients who did not perform a cancer screening test | 1.17 (1.05–1.30)     | 0.004  |
| Performed a cancer screening test, Jewish patients                                     | 0.81 (0.73–0.89)     | <0.001 |
| Interaction population group 1 = Arabs * performed a cancer screening test             | 1.16 (0.99–1.36)     | 0.067  |

<sup>a</sup> CI: confidence intervals; IHD: ischemic heart disease; PR: prevalence ratio.

Each model included the following variables: age, sex, population group, IHD, congestive heart failure, arrhythmia, stroke, cardiac catheterization, past heart surgery, kidney disease, neurodegenerative disease, asthma, mental illness, disability, obesity, smoking, influenza vaccination, consulting a specialist, consulting a diabetes specialist, consulting a cardiologist, consulting with an ophthalmologist, performing a cancer screening test, emergency department visit, and the interaction terms presented in the table. The full models are presented in [S4 Table](#).

<https://doi.org/10.1371/journal.pone.0215639.t004>

## Discussion

We examined the correlates of hospitalizations in internal medicine divisions among adults with hypertension, diabetes and CVD, utilizing the database of the largest health maintenance organization in Israel.

Overall utilization of hospitalizations in internal medicine divisions was significantly greater among Arab than Jewish patients, after adjustment for demographic factors, background morbidity and health care utilization patterns. The percentage of patients with at least one hospitalization during a one-year period was higher in Arab than Jewish patients. The higher hospitalization rate among Arab patients was somewhat surprising given their substantially younger age (by 7 years) compared to Jewish patients. Moreover, the percentage of hospitalizations increased significantly already by age 50 years among Arab patients, while among Jewish patients a significant increase was observed from age 70 years. This likely reflects higher NCD burden in Arab patients and greater prevalence of smoking in Arab men; these factors are considered to explain disparities in life expectancy between the Arab and Jewish populations in Israel [10, 14, 15]. Ethnicity was highly correlated with residential SES; therefore, it is difficult to tease-out the specific role of ethnicity vs. SES, especially given the lack of individual level SES indicators in the database. Arab towns in our study clustered in low SES ranks ([S2 Fig](#)), with limited variability in this indicator. Among Jewish patients, higher residential SES was inversely related to hospitalizations in internal medicine divisions. Associations of social

Table 5. Multivariable analysis of the correlates of hospitalizations in internal medicine divisions by population and sex groups <sup>a</sup>.

|                                                     | Jewish men           |        | Arab men             |        | Jewish women         |        | Arab women           |        |
|-----------------------------------------------------|----------------------|--------|----------------------|--------|----------------------|--------|----------------------|--------|
|                                                     | Adjusted PR (95% CI) | P      | Adjusted PR (95% CI) | P      | Adjusted PR (95% CI) | P      | Adjusted PR (95% CI) | P      |
| <b>Sociodemographic variables</b>                   |                      |        |                      |        |                      |        |                      |        |
| SES place of residence                              | 0.89 (0.77–1.02)     | 0.08   | 1.00 (0.91–1.10)     | 0.9    | 0.85 (0.75–0.97)     | 0.02   | 1.01 (0.91–1.11)     | 0.8    |
| Age in years (a continuous variable)                | 1.01 (1.01–1.02)     | 0.03   | 1.01 (0.99–1.02)     | 0.16   | 1.02 (1.01–1.03)     | <0.001 | 1.02 (1.01–1.03)     | <0.001 |
| <b>Background morbidity</b>                         |                      |        |                      |        |                      |        |                      |        |
| Diabetes                                            | 1.12 (0.95–1.31)     | 0.17   | 0.95 (0.79–1.15)     | 0.6    | 1.10 (0.95–1.29)     | 0.2    | 1.17 (0.95–1.42)     | 0.14   |
| IHD                                                 | 1.06 (0.89–1.27)     | 0.5    | 1.18 (0.95–1.46)     | 0.13   | 1.16 (0.98–1.39)     | 0.09   | 1.13 (0.91–1.42)     | 0.2    |
| CHF                                                 | 1.55 (1.22–1.97)     | <0.001 | 1.31 (1.02–1.68)     | 0.04   | 1.56 (1.21–2.02)     | 0.001  | 1.53 (1.16–2.02)     | 0.003  |
| Arrhythmia                                          | 1.59 (1.31–1.92)     | <0.001 | 1.53 (1.21–1.92)     | <0.001 | 1.63 (1.36–1.95)     | <0.001 | 1.53 (1.21–1.94)     | <0.001 |
| Stroke                                              | 1.61 (1.33–1.95)     | <0.001 | 1.57 (1.23–2.02)     | <0.001 | 1.51 (1.25–1.83)     | <0.001 | 1.96 (1.55–2.48)     | <0.001 |
| Cardiac catheterization                             | 1.49 (1.21–1.82)     | <0.001 | 2.04 (1.65–2.53)     | <0.001 | 1.59 (1.21–2.09)     | 0.001  | 1.89 (1.40–2.55)     | 0.001  |
| Past heart surgery                                  | 1.78 (1.11–2.83)     | 0.02   | 1.53 (0.91–2.56)     | 0.11   | 1.31 (0.57–3.01)     | 0.5    | 0.89 (0.39–2.10)     | 0.7    |
| Kidney disease                                      | 1.47 (1.19–1.82)     | <0.001 | 1.58 (1.19–2.09)     | 0.002  | 1.47 (1.15–1.89)     | 0.002  | 1.62 (1.18–2.21)     | 0.003  |
| Neurodegenerative disease                           | 1.53 (1.13–2.06)     | 0.005  | 1.69 (1.05–2.73)     | 0.03   | 1.32 (1.03–1.69)     | 0.03   | 1.47 (0.92–2.33)     | 0.11   |
| Asthma                                              | 1.33 (1.02–1.73)     | 0.03   | 1.32 (0.99–1.75)     | 0.057  | 1.43 (1.17–1.76)     | 0.001  | 1.21 (0.93–1.56)     | 0.16   |
| Mental illness                                      | 1.28 (1.06–1.54)     | 0.009  | 1.39 (1.05–1.84)     | 0.02   | 1.40 (1.20–1.63)     | <0.001 | 1.42 (1.09–1.85)     | 0.009  |
| Disability                                          | 1.81 (1.38–2.36)     | <0.001 | 1.65 (1.19–2.28)     | 0.003  | 1.44 (1.17–1.78)     | 0.001  | 1.43 (1.09–1.88)     | 0.01   |
| <b>Health behaviors and health care utilization</b> |                      |        |                      |        |                      |        |                      |        |
| Obesity                                             | 1.16 (0.98–1.36)     | 0.08   | 1.15 (0.97–1.37)     | 0.11   | 1.16 (1.00–1.35)     | 0.05   | 1.09 (0.91–1.32)     | 0.3    |
| Smoking                                             | 1.31 (1.12–1.52)     | 0.001  | 1.42 (1.15–1.76)     | 0.001  | 1.13 (0.93–1.37)     | 0.2    | 1.23 (0.94–1.62)     | 0.14   |
| Influenza vaccination                               | 1.03 (0.87–1.21)     | 0.7    | 1.27 (1.05–1.53)     | 0.02   | 1.00 (0.86–1.17)     | 0.9    | 1.24 (1.03–1.51)     | 0.03   |
| Consulted a specialist                              | 1.45 (1.14–1.86)     | 0.003  | 1.24 (0.94–1.62)     | 0.13   | 1.37 (1.09–1.73)     | 0.007  | 1.13 (0.86–1.49)     | 0.3    |
| Consulted a diabetes specialist                     | 0.98 (0.74–1.30)     | 0.8    | 1.01 (0.76–1.33)     | 0.9    | 1.16 (0.90–1.49)     | 0.2    | 1.38 (1.07–1.78)     | 0.01   |
| Consulted a cardiologist                            | 1.88 (1.57–2.25)     | <0.001 | 1.86 (1.51–2.29)     | <0.001 | 1.70 (1.44–2.01)     | <0.001 | 2.31 (1.88–2.85)     | <0.001 |
| Consulted an ophthalmologist                        | 0.85 (0.72–0.99)     | 0.049  | 1.05 (0.86–1.28)     | 0.6    | 0.81 (0.69–0.94)     | 0.007  | 1.03 (0.85–1.26)     | 0.7    |
| Performed a cancer screening test                   | 0.84 (0.72–0.98)     | 0.03   | 0.96 (0.80–1.15)     | 0.6    | 0.86 (0.72–1.01)     | 0.07   | 0.88 (0.72–1.06)     | 0.18   |
| Emergency department visit                          | 1.63 (1.38–1.94)     | <0.001 | 1.44 (1.19–1.73)     | <0.001 | 1.78 (1.52–2.09)     | <0.001 | 1.81 (1.51–2.19)     | <0.001 |

<sup>a</sup> CI: confidence intervals; CHF: congestive heart failure; IHD: ischemic heart disease; PR: prevalence ratio. Adjusted for the variables in the table.

<https://doi.org/10.1371/journal.pone.0215639.t005>

determinants and health disparities [10–12, 26] with patterns of health service utilization has been described [27–30]. Lower health care utilization in patients residing in low SES communities might be expected in countries without universal health insurance. However, our observation, is surprising, suggesting that in a setting of high access to health care, increased utilization might occur in low SES communities.

In addition to the younger age and lower residential SES, Arab patients displayed a different profile of cardiometabolic diseases. CVD and diabetes were significantly more common among Arab patients while the prevalence of hypertension was similar between the population groups. These observations are in agreement with previous reports by our team and others [10–12].

As expected, high comorbidity burden was positively associated with hospitalizations in both Arab and Jewish patients. Positive associations between multi-morbidity with NCDs and increased risk of hospitalizations and with utilization of other health care services were reported in several countries [31–33]. Obviously, the greater medical needs of patients with multi-morbidity can explain their greater utilization of health care services. Assessing the

comorbidity burden is informative; however, from the view of the health care provider and public health, understanding the specific illnesses that contribute to increased hospitalizations is important. In both population groups, we found that several diseases, rather than one specific disease, in addition to having a disability, were associated with increased risk of hospitalizations; the diseases included CVD, kidney disease, mental illnesses and neurodegenerative diseases. These findings are in agreement with previous reports [27, 34, 35], and might explain associations between perceived health status and hospitalization risk [27, 31, 36]. CVD is a major cause of mortality [10]; therefore, a strong relationship between CVD and hospitalizations in internal medicine divisions might be expected. However, CVD comprises various conditions. We found that CHF, arrhythmia, having a history of cardiac catheterization and heart surgery (as indicators of IHD) were significantly positively related to hospitalizations. Possibly, some of the hospitalizations were directly related to treating acute conditions such as worsening of CHF or recurrence of arrhythmia. This is consistent with efforts that are invested in community management of CHF to reduce the burden of recurrent avoidable hospitalizations of these patients. A positive association was found between kidney disease and hospitalizations in internal medicine divisions. Kidney disease is ranked as the 7th leading cause of death in Israel, causing 3.9% of all deaths [37]. Typically, end-stage kidney disease is managed through out-patient nephrology units, with assistance from National Insurance Institute of Israel. Worsening of severe kidney disease can justify hospitalization. Patients with asthma were more often hospitalized than patients without asthma. Niefeld et al. [35] also showed that asthma is a risk factor for preventable hospitalizations in elderly patients with diabetes in the United States [35]. This might be related to less controlled disease [38, 39].

Having a mental illness or a neurodegenerative disease was associated with increased hospitalizations. Increased risk of hospitalization in relation to mental and neurodegenerative illnesses was also shown among elderly diabetic patients [35]. Himelhoch and colleagues [40] showed increased risk of hospitalizations and visits to the emergency room in patients with depression and NCDs compared to patients without these conditions. Depression and other mental illnesses may be related to health care utilization through increasing the severity of background morbidity.

Having a disability was associated with increased hospitalization, in agreement with previous reports [27, 41]. Additionally, smoking was significantly associated with increased hospitalization in both Jewish and Arab men. The prevalence of smoking is highest in Israel among Arab men, estimated at 43.9%, compared to 22.1% and 15.0% in Jewish men and women, respectively; while in Arab women the prevalence of smoking is estimated at 6.7% [10]. Smoking seems to positively correlate with hospitalization, beyond its causative role in NCDs. Our observation is supported by other reports [34, 41].

While associations of sociodemographic factors and NCD comorbidity with the utilization of hospitalizations in internal medicine divisions may be expected, the positive associations observed between utilization of other health care services and hospitalizations, such as previous emergency room visits and consulting with specialist physicians, is of particular interest. These associations could be due to a general tendency towards increased consumption of health services, or simply the tendency of more severe patients to consume health services of different types. Conversely, performing cancer screening tests (i.e., occult stool test, PSA and mammography) and consulting with an ophthalmologist were inversely related to hospitalizations, mainly in the Jewish sample ( $P = 0.067$  and  $P = 0.009$ , respectively, for interaction). Likely, performing cancer screening tests and consulting with an ophthalmologist are markers of healthy lifestyle.

Our study has strengths and limitations. We used electronic medical records of patients belonging to the largest HMO in Israel. Differences between physicians in coding diseases may

have had an impact on the quality of data, and also differences in documenting disability, smoking and obesity. However, such information bias is likely non-differential, thus leading the association measure towards the null. Individual-level information on SES was lacking. The sample size was large, thus enabling us to conduct this comprehensive assessment of correlates of hospitalizations, and to identify important associations and interactions. We focused on one region in Israel. This was stimulated by known regional variation in health indicators and socioeconomic factors. Our findings may be generalizable to other populations with similar characteristics and health care systems.

In conclusion, in a country with universal health insurance, associations were found of sociodemographic factors, morbidity, health behaviors and health service use with hospitalization in internal medicine divisions. Socioeconomic disparities might account for ethnic differences in hospitalization patterns. Several NCDs, rather than one specific disease, in addition to disability and smoking, were related to hospitalization use; these factors should be targeted in an effort to reduce healthcare costs related to hospitalizations.

## Supporting information

### **S1 Checklist. STROBE checklist.**

(DOCX)

**S1 Table. List of variables analyzed in the study.** CVD: cardiovascular disease; IHD: ischemic heart disease; SES: socioeconomic status.

(DOCX)

**S2 Table. Definition of composite variables.** CVD: cardiovascular disease; PSA: prostatic specific antigen.

(DOCX)

**S3 Table. Multivariable analysis of the correlates of hospitalizations in internal medicine divisions among patients aged  $\geq 40$  years with cardiovascular disease, diabetes or hypertension.** CI: confidence intervals; CHF: congestive heart failure; IHD: ischemic heart disease; PR: prevalence ratio; SES: socioeconomic status. Adjusted for the variables in the table. This pooled analysis of both population groups (Arab and Jewish patients) that included the variable residential SES instead of population group.

(DOCX)

**S4 Table. Sensitivity analyses of pooled multivariable models of the correlates of hospitalizations in internal medicine divisions with interaction terms.** CI: confidence intervals; CHF: congestive heart failure; IHD: ischemic heart disease; PR: prevalence ratio. Adjusted for the variables in the table.

(DOCX)

**S1 Fig. Correlation matrix of the independent variables.** Data presented are correlation coefficients: green gradient represents positive correlation, red gradient represents negative correlation, yellow  $\sim 0$  (no correlation) CVD: cardiovascular disease; CHF: congestive heart failure; DM: diabetes mellitus; ER: emergency room department; IHD: ischemic heart disease; SES: socioeconomic status.

(TIF)

**S2 Fig.** Residential socioeconomic status of Jewish participants (A) and Arab participants (B).

(TIF)

## Acknowledgments

This study was conducted in partial fulfilment of the master's degree in Public Health (MPH) of Dr. Shira Sagie, at the Department of Epidemiology and Preventive Medicine, School of Public Health, Sackler Faculty of Medicine, Tel Aviv University, Tel Aviv, Israel.

We thank Ms. Sophy Goren from Tel Aviv University for her help in data management.

## Author Contributions

**Conceptualization:** Wasef Na'amnih, Daniel Cohen, Gershon Alpert, Khitam Muhsen.

**Data curation:** Juda Frej, Daniel Cohen, Gershon Alpert, Khitam Muhsen.

**Formal analysis:** Shira Sagie, Wasef Na'amnih, Khitam Muhsen.

**Funding acquisition:** Gershon Alpert, Khitam Muhsen.

**Investigation:** Shira Sagie, Wasef Na'amnih, Juda Frej, Daniel Cohen, Gershon Alpert, Khitam Muhsen.

**Methodology:** Shira Sagie, Wasef Na'amnih, Juda Frej, Daniel Cohen, Gershon Alpert, Khitam Muhsen.

**Project administration:** Wasef Na'amnih, Juda Frej, Daniel Cohen, Gershon Alpert, Khitam Muhsen.

**Resources:** Khitam Muhsen.

**Supervision:** Daniel Cohen, Gershon Alpert, Khitam Muhsen.

**Writing – original draft:** Shira Sagie.

**Writing – review & editing:** Shira Sagie, Wasef Na'amnih, Juda Frej, Daniel Cohen, Gershon Alpert, Khitam Muhsen.

## References

1. Mortality GBD, Causes of Death C. Global, regional, and national age-sex specific all-cause and cause-specific mortality for 240 causes of death, 1990–2013: a systematic analysis for the Global Burden of Disease Study 2013. *Lancet*. 2015; 385: 117–71. [https://doi.org/10.1016/S0140-6736\(14\)61682-2](https://doi.org/10.1016/S0140-6736(14)61682-2) PMID: 25530442
2. Gaziano TA, Bitton A, Anand S, Abrahams-Gessel S, Murphy A. Growing epidemic of coronary heart disease in low- and middle-income countries. *Curr. Probl. Cardiol*. 2010; 35: 72–115. <https://doi.org/10.1016/j.cpcardiol.2009.10.002> PMID: 20109979
3. Auger N, Harper S, Barry AD, Trempe N, Daniel M. Life expectancy gap between the Francophone majority and Anglophone minority of a Canadian population. *Eur. J. Epidemiol*. 2012; 27(1): 27–38. <https://doi.org/10.1007/s10654-011-9644-8> PMID: 22203340
4. Partin MR, Burgess DJ. Reducing health disparities or improving minority health? the end determines the means. *J. Gen. Intern. Med*. 2012; 27: 887–9. <https://doi.org/10.1007/s11606-012-2108-3> PMID: 22592356
5. Harper S, MacLehose RF, Kaufman JS. Trends in the Black-White life expectancy gap among US States, 1990–2009. *Health. Aff*. 2014; 33: 1375–82.
6. Wohland P, Rees P, Nazroo J, Jagger C. Inequalities in healthy life expectancy between ethnic groups in England and Wales in 2001. *Ethn. Health*. 2015; 20: 341–53. <https://doi.org/10.1080/13557858.2014.921892> PMID: 24897306
7. Williams DR. Race, socioeconomic status, and health—The added effects of racism and discrimination. *Ann. N. Y. Acad. Sci*. 1999; 896: 173–88. PMID: 10681897
8. Di Cesare M, Khang YH, Asaria P, Blakely T, Cowan MJ, Farzadfar F, et al. Inequalities in non-communicable diseases and effective responses. *Lancet*. 2013; 381: 585–97. [https://doi.org/10.1016/S0140-6736\(12\)61851-0](https://doi.org/10.1016/S0140-6736(12)61851-0) PMID: 23410608
9. Israel Central Bureau of Statistics. Causes of death in Israel, 2016. State of Israel, 2018.

10. Muhsen K, Green MS, Soskolne V, Neumark Y. Inequalities in non-communicable diseases between the major population groups in Israel: achievements and challenges. *Lancet*. 2017; 389: 2531–41. [https://doi.org/10.1016/S0140-6736\(17\)30574-3](https://doi.org/10.1016/S0140-6736(17)30574-3) PMID: 28495112
11. Jabara R, Namouz S, Kark JD, Lotan C. Risk characteristics of Arab and Jewish women with coronary heart disease in Jerusalem. *Isr. Med. Assoc. J.* 2007; 9: 316–20. PMID: 17491229
12. Plakht Y, Gilutz H, Shiyovich A. Ethnical disparities in temporal trends of acute myocardial infarction (AMI) throughout a decade in Israel. Soroka acute myocardial infarction (SAMI-II) project. *Int. J. Cardiol.* 2016; 214: 469–76. <https://doi.org/10.1016/j.ijcard.2016.04.009> PMID: 27093685
13. Israel Central Bureau of Statistics. Statistical Abstract of Israel 2018 Vol. 69: State of Israel 2018.
14. Na'amnih W, Muhsen K, Tarabeia J, Saabneh A, Green MS. Trends in the gap in life expectancy between Arabs and Jews in Israel between 1975 and 2004. *Int. J. Epidemiol.* 2010; 39:1324–32. <https://doi.org/10.1093/ije/dyq073> PMID: 20534651
15. Saabneh AM. Arab-Jewish gap in life expectancy in Israel. *Eur. J. Public. Health.* 2016; 26: 433–8. <https://doi.org/10.1093/eurpub/ckv211> PMID: 26612884
16. Israel Center for Disease Control. Israeli National Health Interview Survey (INHIS-1) 2003–2004.: Ministry of Health, 2006.
17. Israel Center for Disease Control. Israel National health Interview Survey (INHIS-2) 2007–2010. Ministry of Health, 2012.
18. Baron-Epel O, Garty N, Green MS. Inequalities in use of health services among Jews and Arabs in Israel. *Health. Serv. Res.* 2007; 42: 1008–19. <https://doi.org/10.1111/j.1475-6773.2006.00645.x> PMID: 17489901
19. Jang M, Lee E, Woo K. Income, language, and citizenship status: factors affecting the health care access and utilization of Chinese Americans. *Health. Soc. Work.* 1998; 23: 136–45. PMID: 9598396
20. Redondo-Sendino A, Guallar-Castillon P, Banegas JR, Rodriguez-Artalejo F. Gender differences in the utilization of health-care services among the older adult population of Spain. *BMC. Public. Health.* 2006; 6:155. <https://doi.org/10.1186/1471-2458-6-155> PMID: 16780576
21. Khatib M, Efrat S, Deeb D. Knowledge, beliefs, and economic barriers to healthcare: a survey of diabetic patients in an Arab-Israeli town. *J. Ambul. Care. Manage.* 2007; 30: 79–85. PMID: 17170641
22. Muhsen K, Gershon A, Naamnih W. Comparisons of rates and determinants of hospitalizations among patients with chronic diseases from the Jewish and Arab populations. Available at: <http://www.israelhpr.org.il/e/88/904.htm>.
23. Balicer RD, Afek A. Digital health nation: Israel's global big data innovation hub. *Lancet*. 2017; 389: 2451–3. [https://doi.org/10.1016/S0140-6736\(17\)30876-0](https://doi.org/10.1016/S0140-6736(17)30876-0) PMID: 28495105
24. Rennert G, Peterburg Y. Prevalence of selected chronic diseases in Israel. *Isr. Med. Assoc. J.* 2001; 3: 404–8. PMID: 11433630
25. Israel Central Bureau of Statistics. Characterization and classification of geographic units by the socio-economic level of the population 2006. 2009.
26. Marmot M. Social determinants of health inequalities. *Lancet* 2005; 365: 1099–104. [https://doi.org/10.1016/S0140-6736\(05\)71146-6](https://doi.org/10.1016/S0140-6736(05)71146-6) PMID: 15781105
27. Culler SD, Parchman ML, Przybylski M. Factors related to potentially preventable hospitalizations among the elderly. *Med. Care.* 1998; 36: 804–17. PMID: 9630122
28. Shi L, Samuels ME, Pease M, Bailey WP, Corley EH. Patient characteristics associated with hospitalizations for ambulatory care sensitive conditions in South Carolina. *South. Med. J.* 1999; 92: 989–98. PMID: 10548172
29. Agabiti N, Pirani M, Schifano P, Cesaroni G, Davoli M, Bisanti L et al. Income levEL and chronic ambulatory care sensitive conditions in adults: a multicity population-based study in Italy. *BMC. Public. Health.* 2009; 9: 457. <https://doi.org/10.1186/1471-2458-9-457> PMID: 20003336
30. Xie X, Wu QH, Hao YH, Yin H, Fu W, Ning N, et al. Identifying determinants of socioeconomic inequality in health service utilization among patients with chronic non-communicable diseases in China. *PloS. One.* 2014; 9(6).
31. Jankovic J, Mirkovic M, Jovic-Vranes A, Santric-Milicevic M, Terzic-Supic Z. Association between non-communicable disease multimorbidity and health care utilization in a middle-income country: population-based study. *Public. Health.* 2018; 155: 35–42. <https://doi.org/10.1016/j.puhe.2017.11.014> PMID: 29306621
32. Palladino R, Lee JT, Ashworth M, Triassi M, Millett C. Associations between multimorbidity, healthcare utilisation and health status: evidence from 16 European countries. *Age. Ageing.* 2016; 45(3): 431–5. <https://doi.org/10.1093/ageing/afw044> PMID: 27013499

33. Lee JT, Hamid F, Pati S, Atun R, Millett C. Impact of noncommunicable disease multimorbidity on healthcare utilisation and out-of-pocket expenditures in middle-income countries: cross sectional analysis. *PloS. One*. 2015; 10(7): e0127199. <https://doi.org/10.1371/journal.pone.0127199> PMID: 26154083
34. Sibai AM, Iskandarani M, Darzi A, Nakkash R, Saleh S, Fares S, et al. Cigarette smoking in a Middle Eastern country and its association with hospitalisation use: a nationwide cross-sectional study. *BMJ. Open*. 2016; 6(4).
35. Niefeld MR, Braunstein JB, Wu AW, Saudek CD, Weller WE, Anderson GF. Preventable hospitalization among elderly Medicare beneficiaries with type 2 diabetes. *Diabetes. Care*. 2003; 26: 1344–9. PMID: 12716786
36. Jankovic J, Siljak S, Eric M, Marinkovic J, Jankovic S. Inequalities in the utilization of health care services in a transition European country: results from the national population health survey. *Int. J. Public. Health*. 2018; 63(2): 261–72. <https://doi.org/10.1007/s00038-017-1009-y> PMID: 28710507
37. Israel Center for Disease Control. *Health 2013*. Vol. 354: Israel Ministry of Health, 2014.
38. Marin-Centeno HA, Ramos-Valencia G, Rodriguez-Sanchez M, Gonzalez-Gavillan J, Diaz-Toro EC, Torres-Cintrón M. Association between health care utilization with asthma control levels among a sample of adult patients in Puerto Rico. *P. R. Health. Sci. J.* 2016; 35: 81–7. PMID: 27232869
39. Gold LS, Thompson P, Salvi S, Faruqi RA, Sullivan SD. Level of asthma control and health care utilization in Asia-Pacific countries. *Resp. Med.* 2014; 108: 271–7.
40. Himelhoch S, Weller WE, Wu AW, Anderson GF, Cooper LA. Chronic medical illness, depression, and use of acute medical services among medicare beneficiaries. *Med. Care*. 2004; 42: 512–21. PMID: 15167319
41. Malta DC, Bernal RTI, Lima MG, Araújo SSC, Silva MMAD, Freitas MIF, et al. Noncommunicable diseases and the use of health services: analysis of the National Health Survey in Brazil. *Rev. Saude. Publ.* 2017; 51.
